# Supplementary material
Source: PubMed Central journal article supplement (PMC166830)

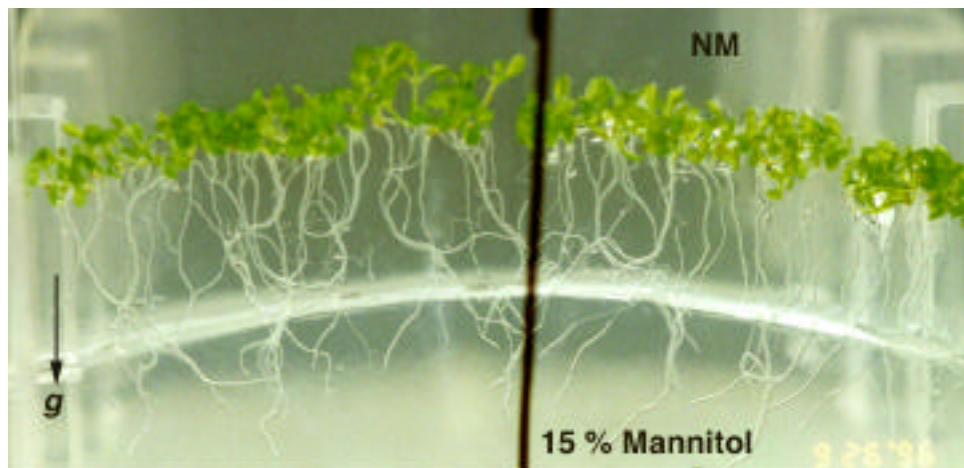

Supplement: plntphys_131_2_536__1.pdf [file plntphys_131_2_536__1.pdf]

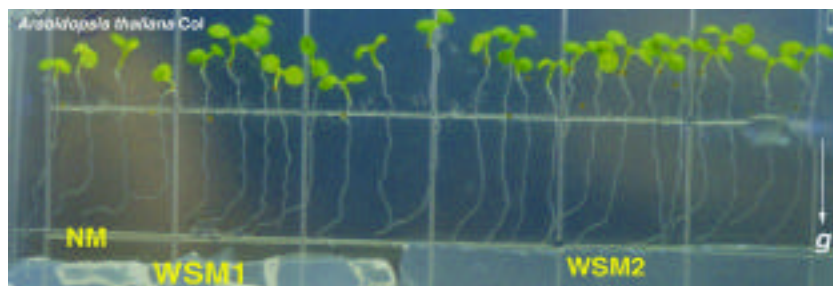

Supplement: plntphys_131_2_536__2.pdf [file plntphys_131_2_536__2.pdf]

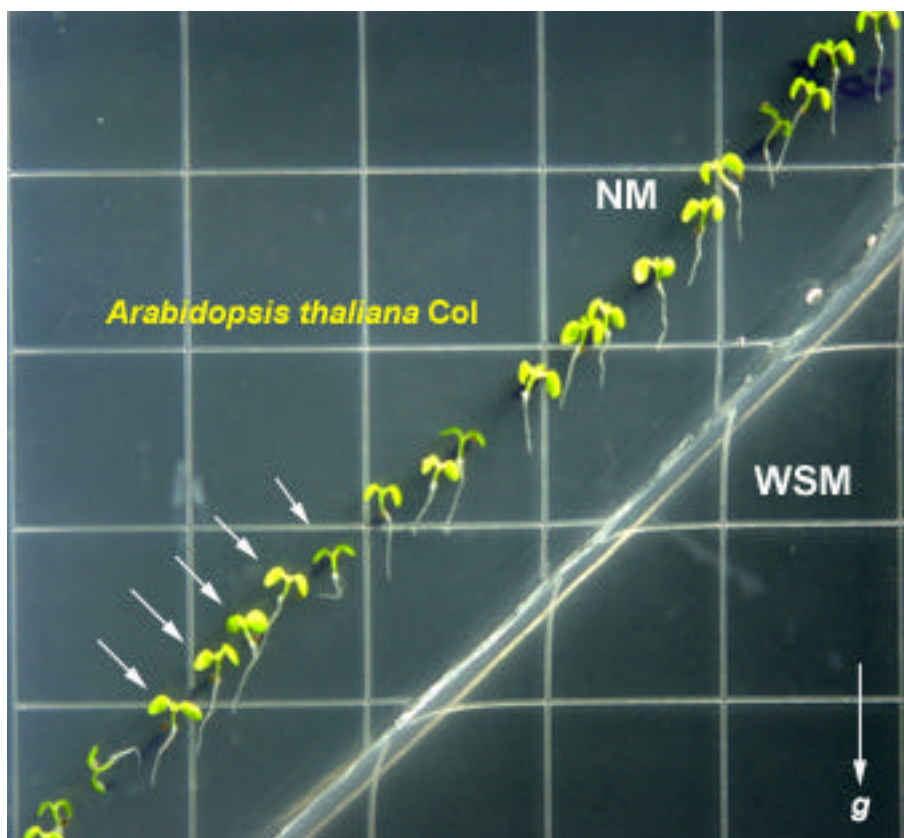

Supplement: plntphys_131_2_536__3.pdf [file plntphys_131_2_536__3.pdf]

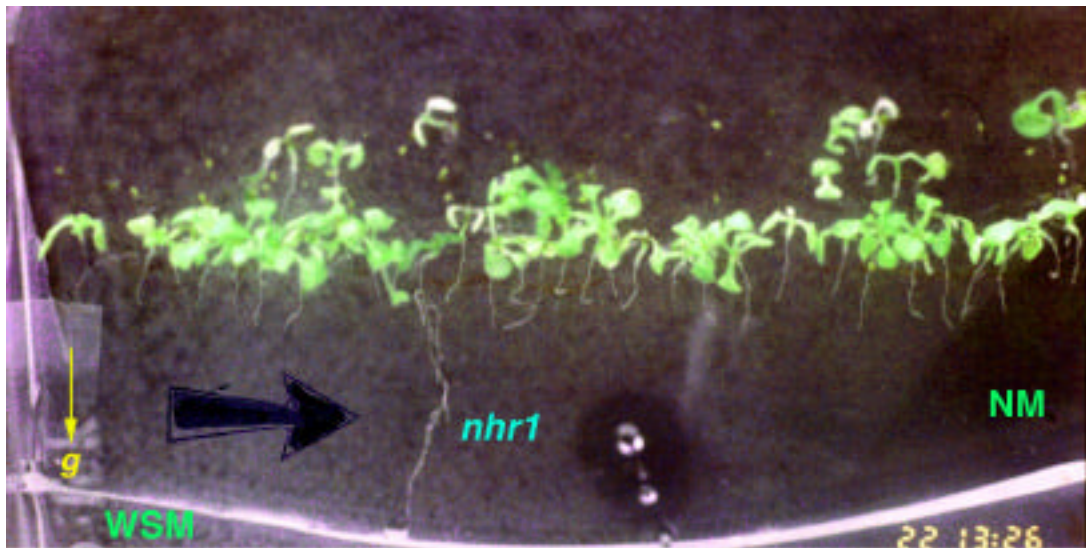

Supplement: plntphys_131_2_536__4.pdf [file plntphys_131_2_536__4.pdf]

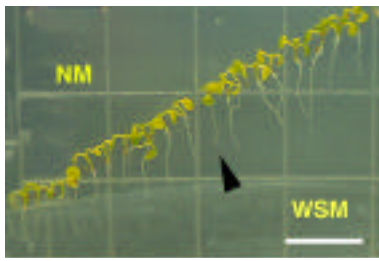

Supplement: plntphys_131_2_536__5.pdf [file plntphys_131_2_536__5.pdf]

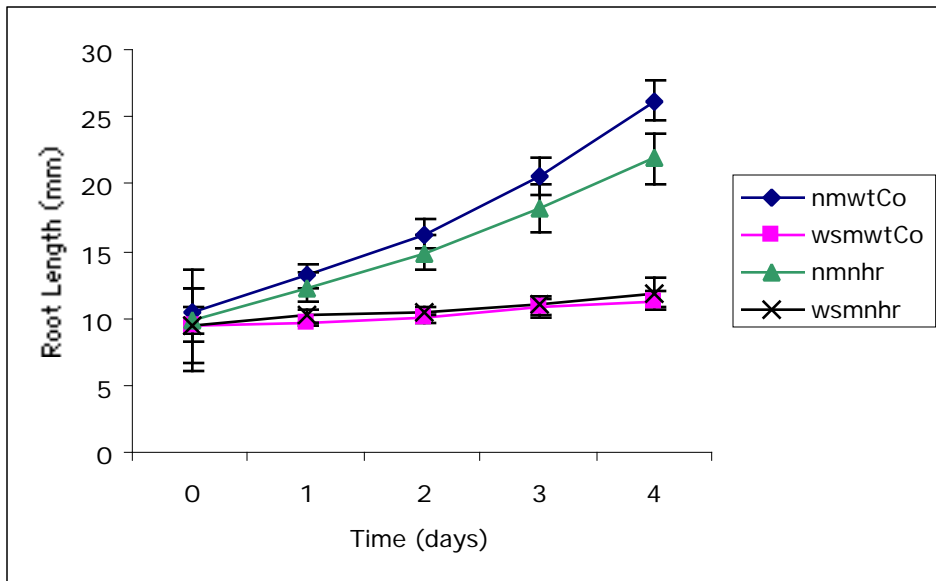

Supplement: plntphys_131_2_536__6.pdf [file plntphys_131_2_536__6.pdf]

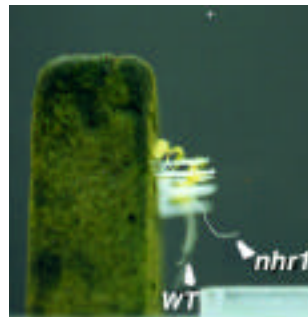

Supplement: plntphys_131_2_536__7.pdf [file plntphys_131_2_536__7.pdf]

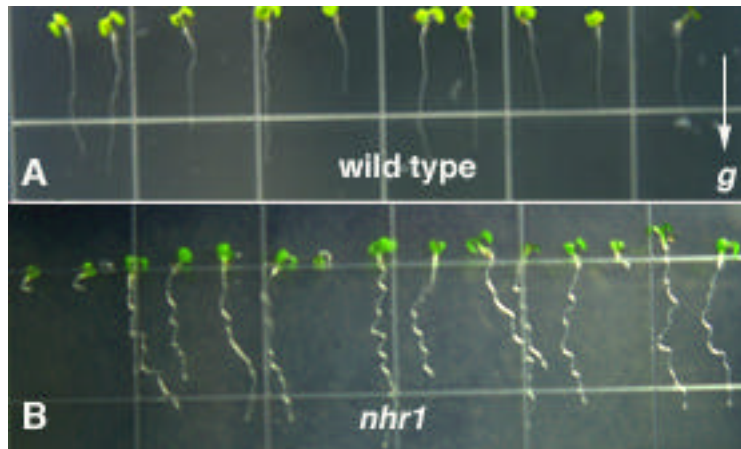

Supplement: plntphys_131_2_536__8.pdf [file plntphys_131_2_536__8.pdf]

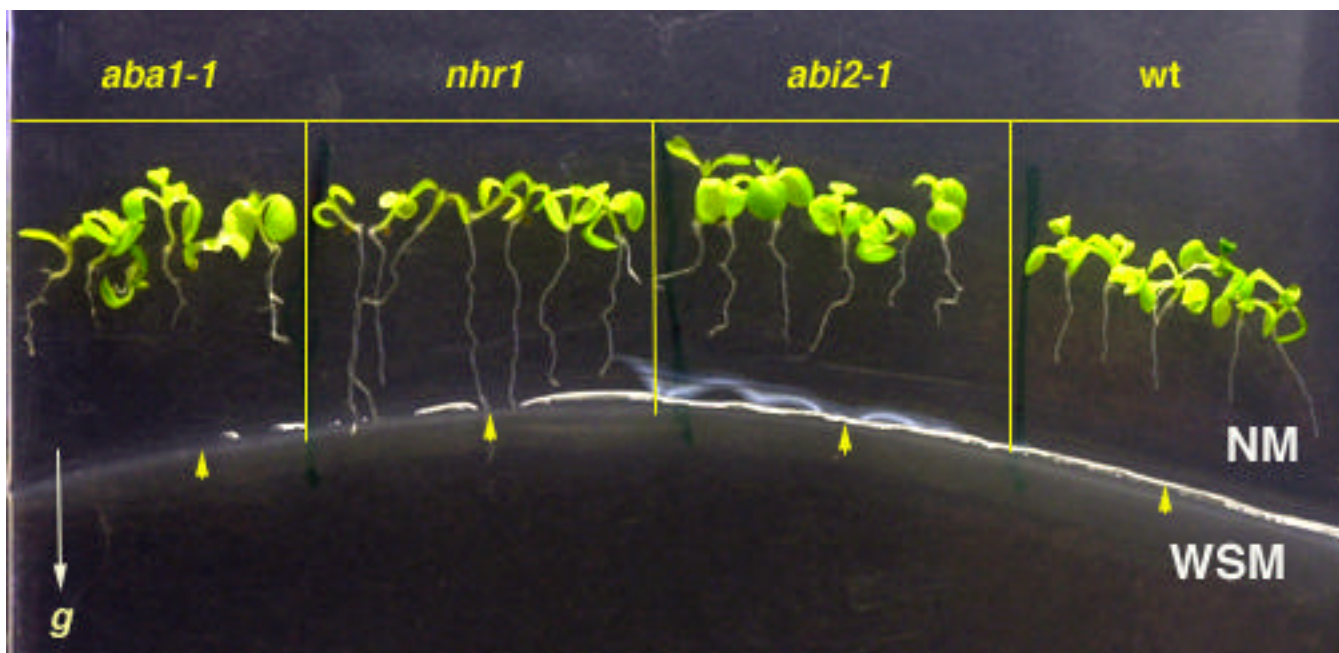

Supplement: plntphys_131_2_536__9.pdf [file plntphys_131_2_536__9.pdf]
